# Supplementary material for: Engineering the Dimensional Interface of BiVO4-2D Reduced Graphene Oxide (RGO) Nanocomposite for Enhanced Visible Light Photocatalytic Performance
Source: PubMed Central journal article supplement (PMC6630799; doi:10.3390/nano9060907), 2019-06-10
Supplement: nanomaterials-09-00907-s001.pdf [file nanomaterials-09-00907-s001.pdf]

# Engineering the Dimensional Interface of BiVO<sub>4</sub>-2D Reduced Graphene Oxide (RGO) Nanocomposite for Enhanced Visible Light Photocatalytic Performance

Jing Sun <sup>1,\*†</sup>, Chunxiao Wang <sup>1†</sup>, Tingting Shen <sup>1</sup>, Hongchen Song <sup>1</sup>, Danqi Li <sup>1</sup>, Rusong Zhao <sup>2</sup> and Xikui Wang <sup>3,\*</sup>

<sup>1</sup> School of Environmental Science and Engineering, Qilu University of Technology (Shandong Academy of Sciences), Ji'nan 250353, China; wangiawangchunxiao@163.com (C.W.); stthunanyt@163.com (T.S.); shc01261005lx@gmail.com (H.S.); autantenporte@163.com (D.L.)

<sup>2</sup> Key Laboratory for Applied Technology of Sophisticated Analytical Instruments of Shandong Province, Analysis and Test Center, Qilu University of Technology (Shandong Academy of Sciences), Ji'nan 250014, China; zhaors1976@126.com

<sup>3</sup> College of Environmental Science and Engineering, Shandong Agriculture and Engineering University, Ji'nan, 251100, China

\* Correspondence: jingsunok@163.com (J.S.); xk\_wang@qlu.edu.cn (X.W.)

† These authors contributed equally to this work.

(7 Pages, 10 Figures)

**Preparation of BiVO<sub>4</sub> nanoparticles.** 2.91 g Bi (NO<sub>3</sub>)<sub>3</sub> 5H<sub>2</sub>O and 0.7204 g NH<sub>4</sub>VO<sub>3</sub> were added into a beaker containing 30 mL 1 M HNO<sub>3</sub> solution. After stirring for a few minutes, 3 g (NH<sub>2</sub>)<sub>2</sub>CO was gradually added into the above solution and then placed in a water bath at a temperature of 80 °C for 24 h. The solution was centrifuged to obtain the yellow sediment and washed with deionized water. The BiVO<sub>4</sub> nanoparticles were dried at 60 °C in an oven and then calcined at 400 °C for 1 h.

**Preparation of BiVO<sub>4</sub> nanoparticles /RGO Composites.** The BiVO<sub>4</sub> nanoparticles and GO solution (1g L<sup>-1</sup>) were dissolved into 50 mL ultrapure water and stirred to ensure complete mixing. Then, the obtained solution was transferred to Teflon-lined autoclave, and maintained at 160 °C for 6 h in an oven. The above product was washed with alcohol and ultrapure water several times, centrifuged, dried at 60 °C in an oven.

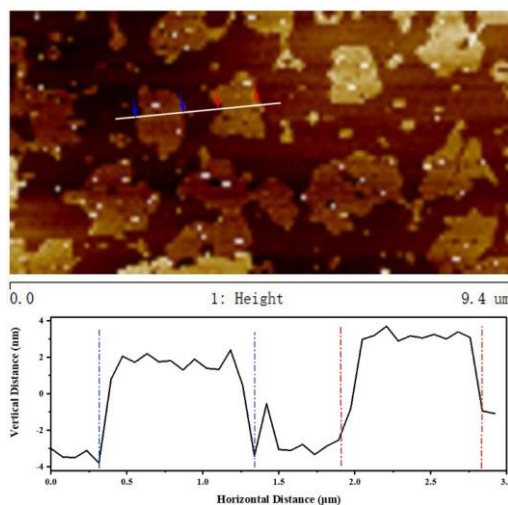

**Figure S1.** Atomic force microscopy images of the 2D BiVO<sub>4</sub> nanosheets.

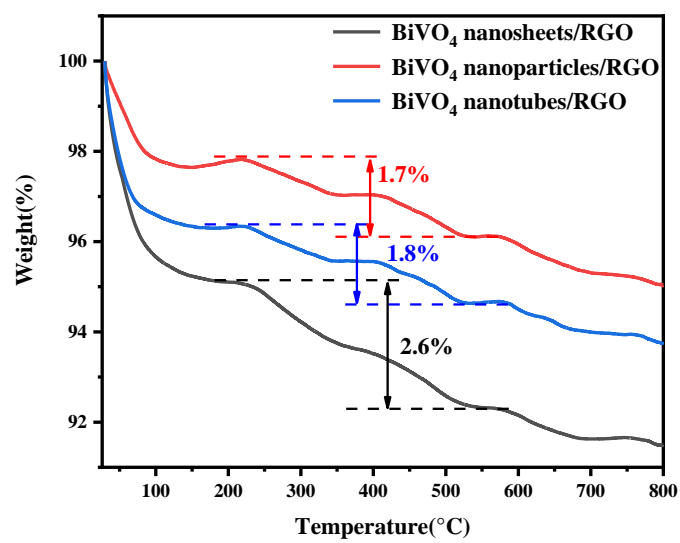

Figure S2. Thermo gravimetric analysis (TGA) of the BiVO<sub>4</sub>/RGO composites.

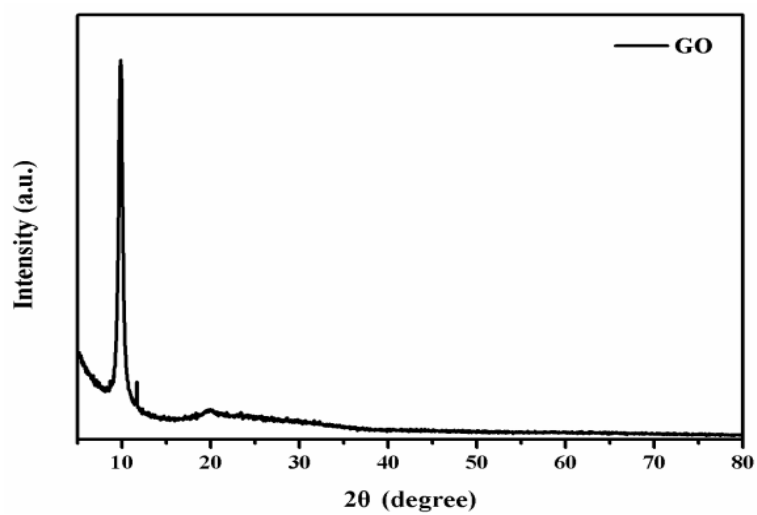

Figure S3. XRD patterns of the prepared graphene oxide (GO).

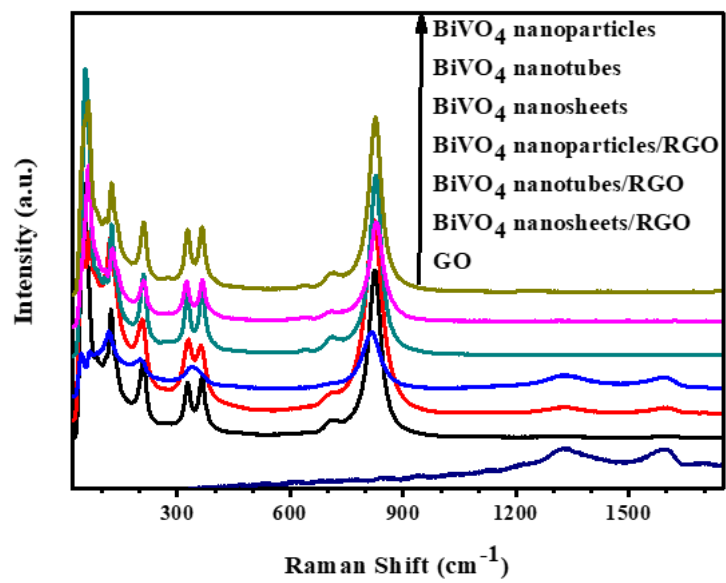

Figure S4. Raman spectra of BiVO<sub>4</sub> and BiVO<sub>4</sub>/RGO composites.

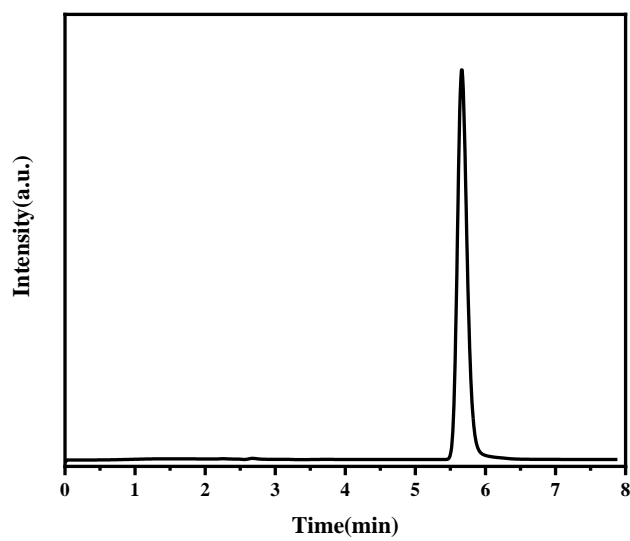

Figure S5. HPLC chromatograms of acetaminophen standard sample.

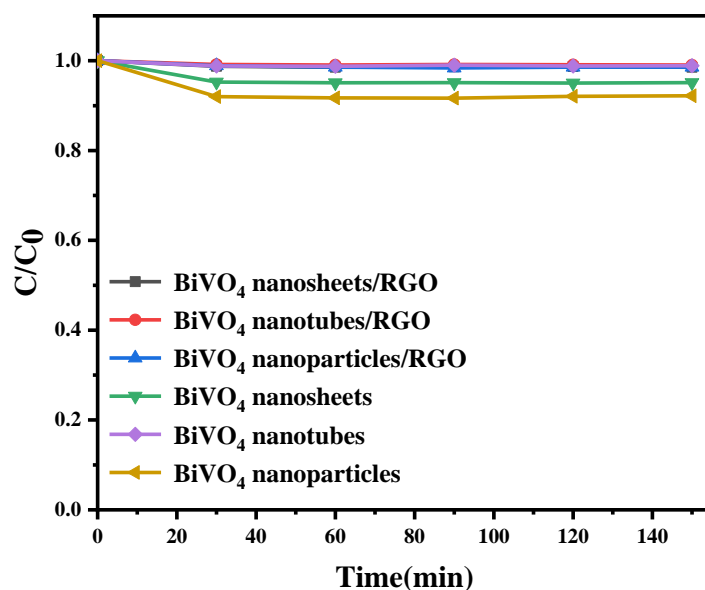

**Figure S6.** The adsorptive performance of acetaminophen over the BiVO<sub>4</sub> and BiVO<sub>4</sub>/RGO composites without visible light irradiation.

**Table S1.** The pseudo-first order kinetic equation and the rate constant (*k*) of BiVO<sub>4</sub> and BiVO<sub>4</sub>/RGO composites.

| Samples                             | First-order kinetic equation     | <i>k</i> (min <sup>-1</sup> ) | R <sup>2</sup> |
|-------------------------------------|----------------------------------|-------------------------------|----------------|
| BiVO <sub>4</sub> nanosheets/RGO    | $-\ln(C/C_0) = 0.0141x - 0.0472$ | 0.0141                        | 0.9976         |
| BiVO <sub>4</sub> nanotubes/RGO     | $-\ln(C/C_0) = 0.0122x - 0.0684$ | 0.0121                        | 0.9963         |
| BiVO <sub>4</sub> nanoparticles/RGO | $-\ln(C/C_0) = 0.0107x - 0.0292$ | 0.0107                        | 0.9990         |
| BiVO <sub>4</sub> nanosheets        | $-\ln(C/C_0) = 0.008x - 0.0142$  | 0.0080                        | 0.9986         |
| BiVO <sub>4</sub> nanotubes         | $-\ln(C/C_0) = 0.0084x - 0.0737$ | 0.0084                        | 0.9915         |
| BiVO <sub>4</sub> nanoparticles     | $-\ln(C/C_0) = 0.0077x - 0.0889$ | 0.0077                        | 0.9924         |

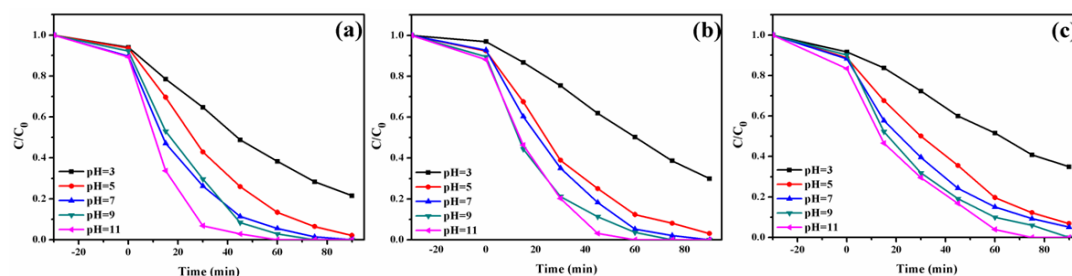

**Figure S7.** Photocatalytic degradation of RhB over photocatalysts under different pH conditions:(a) BiVO<sub>4</sub> nanosheet /RGO; (b) BiVO<sub>4</sub> nanotube /RGO;(c) BiVO<sub>4</sub> nanoparticle /RGO.

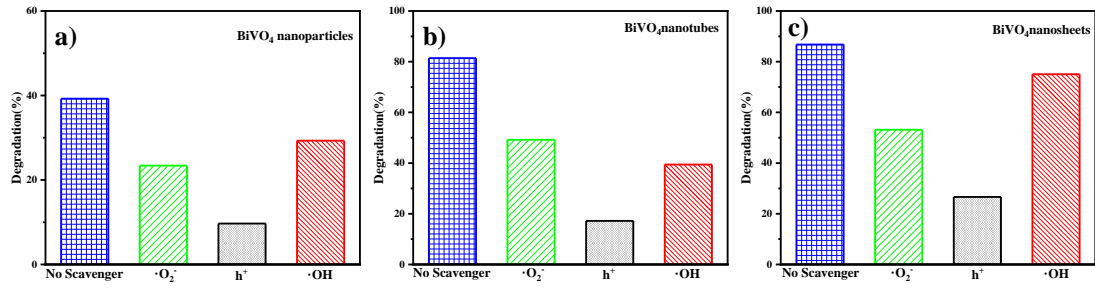

**Figure S8.** Free radical inhibition experiment of BiVO<sub>4</sub> samples: (a) BiVO<sub>4</sub> nanoparticles; (b) BiVO<sub>4</sub> nanotubes; (c) BiVO<sub>4</sub> nanosheets.

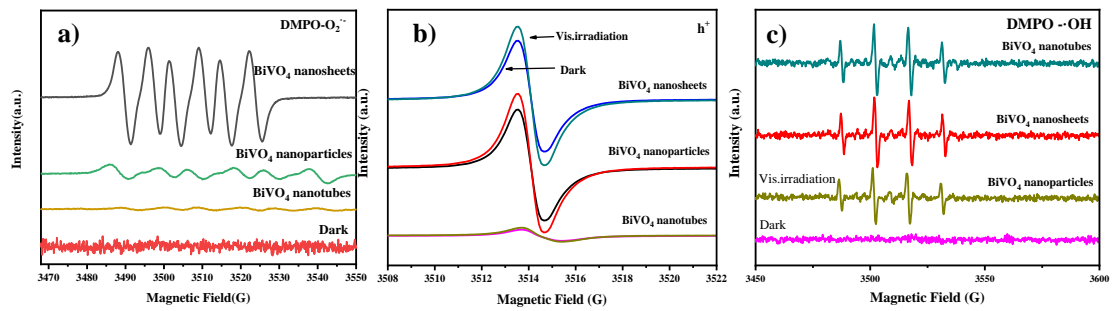

**Figure S9.** Electron spin resonance spectra of radical in BiVO<sub>4</sub> samples under visible light: (a) DMPO-O<sub>2</sub><sup>·-</sup>, (b) h<sup>+</sup> and (c) DMPO-·OH.

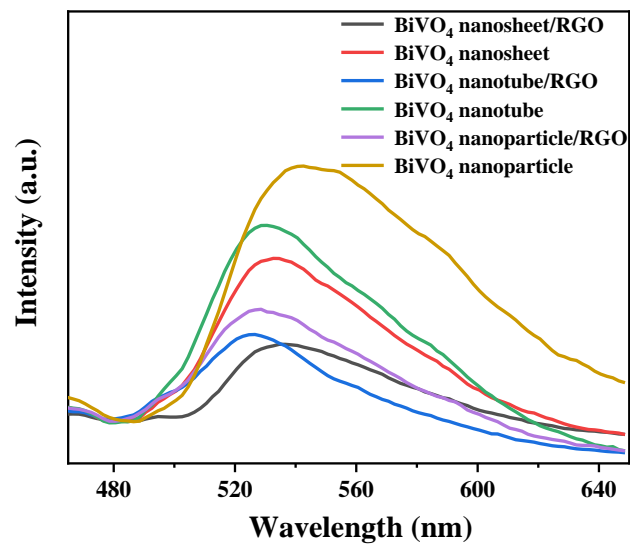

**Figure S10.** PL spectra of BiVO<sub>4</sub> and BiVO<sub>4</sub>/RGO samples.
